# Supplementary material for: Modulating Cholesterol Metabolism via ACAT1 Knockdown Enhances Anti-B-Cell Lymphoma Activities of CD19-Specific Chimeric Antigen Receptor T Cells by Improving the Cell Activation and Proliferation
Source: MDPI journal article supplement (doi:10.3390/cells13060555), 2024-03-21
Supplement: s1 [file s1]

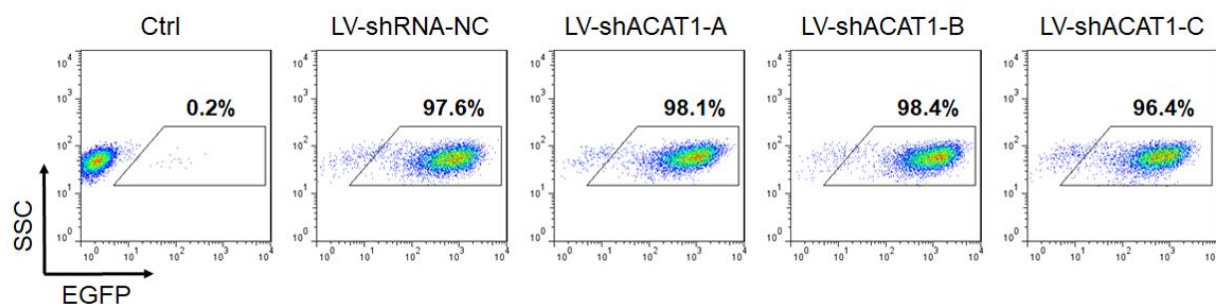

**Supplementary Figure 1.** Analysis of transduction efficiency of lentivirus expressing ACAT1-shRNAs. Jurkat cells were transfected with lentivirus expressing ACAT1-shRNAs in MOI of 5 and EGFP-positive cells were detected by flow cytometry.

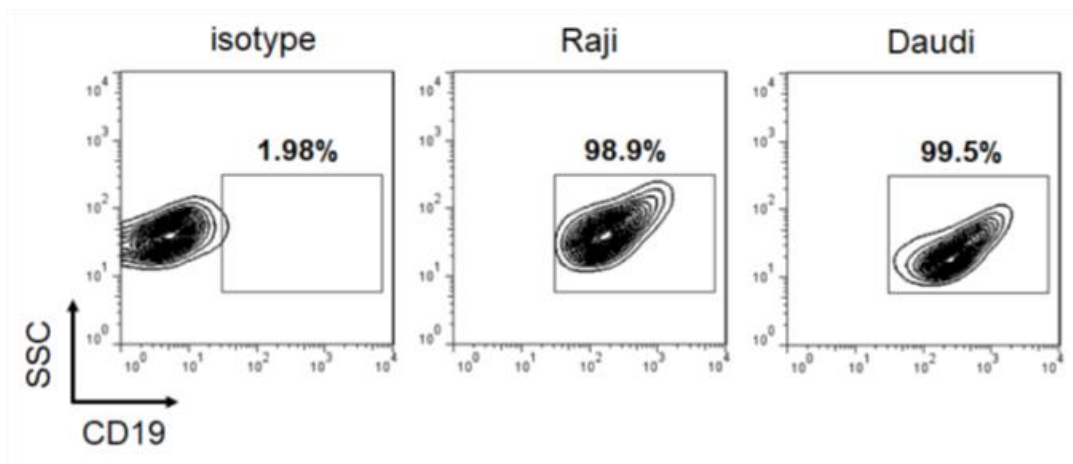

**Supplementary Figure 2.** CD19 expression on Raji and Daudi cell lines. The expression was examined by flow cytometry using fluorescently labeled anti-human CD19 antibodies.
